# Supplementary material
Source: publisher site journal article supplement (https://www.dovepress.com/get_supplementary_file.php?f=452476.docx)
Supplement: Supplementary file 1 [file get_supplementary_file.php]

Supplementary Material

**Increased PD-1+ NK cell subset in the older population**

Meiju Deng1,2#, Yongqin Zeng2,3#, Ying Liu2, Xiaolei Wang1,2, Na Chen1,2, Mengyuan Zhang1,4,5,6, Meiqing Jiang1,4,5,6, Hongxin Zhao2*, Juan Du1,4,5,6*

*1**Beijing Key Laboratory of Emerging Infectious Diseases, Institute of Infectious Diseases,* *Beijing Ditan Hospital, Capital Medical University, Beijing**, 100015, People’s Republic of China.*

*2* *Clinical Center for HIV/AIDS, Beijing Ditan Hospital, Capital Medical University, Beijing, 100015, People’s Republic of China.*

*3Department of Nephrology, The Affiliated Hospital Guizhou Medical University, Guiyang, Guizhou, 550004, People’s Republic of China.*

*4Beijing Institute of Infectious Diseases，Beijing, 100015, People’s Republic of China.*

*5National Center for Infectious Diseases, Beijing Ditan Hospital, Capital Medical University, Beijing, 100015, People’s Republic of China.*

*6National Key Laboratory of Intelligent Tracking and Forecasting for Infectious Diseases, Beijing, 100015, People’s Republic of China.*

#Equal contribution

J Du and H Zhao are co-corresponding authors

***Correspondence:** Juan Du, Email: [duj656@ccmu.edu.cn](mailto:duj656@ccmu.edu.cn)

Hongxin Zhao, Email: Drzhao66@ccmu.edu.cn

**Supplementary Figures
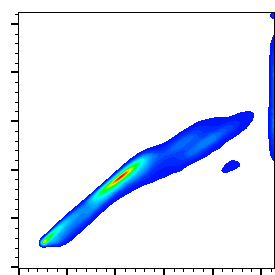

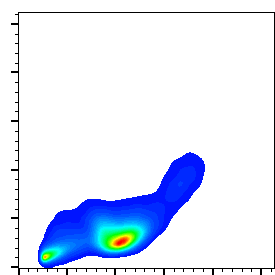

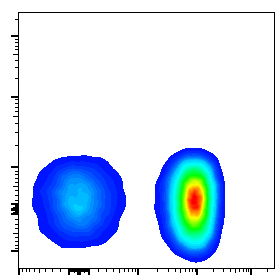

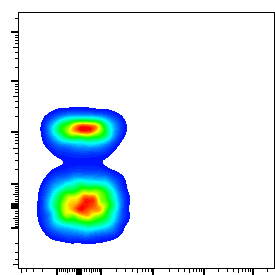

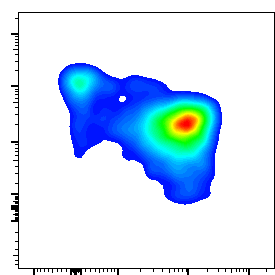
**

FSC-A

FSC-H

FSC-A

SSC-A

CD3

7AAD

CD14

CD19

CD16

CD56

CD56negCD16+

CD56dimCD16+

CD56brightCD16-

**
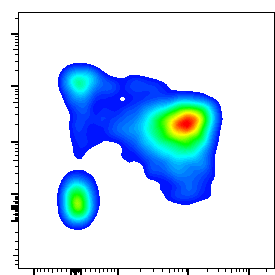
**

CD16

CD56

**Figure S1.** **Flow cytometry gating strategy**

Representative gating strategy for flow cytometry analysis of peripheral blood NK cells in humans.

B

Age in decades

Age in decades

*

Age in decades

A

H

C

Age in decades

Age in decades

Age in decades

D

I

Age in decades

E

Age in decades

F

Age in decades

G

*

**

***

*

****

****

**Figure S2. Changes of absolute number, subset distribution and phenotype on NK cells with age**

Flow cytometry analysis of NK cell absolute number, subset distribution and phenotype was performed on PBMCs collected from donors of three age groups (n = 27-37 for each group).

(A-D) Box plots of the absolute number of NK cells, CD56brightCD16- NK cells, CD56dimCD16+ NK cells and CD56negCD16+ NK cells from donors of three age groups. (E-G) Box plots of the percentage of NK cells subset from donors of three age groups, including CD56brightCD16- NK cells, CD56dimCD16+ NK cells and CD56negCD16+ NK cells. (H, I) Box plots of the percentage of CD57+ and CD69+  NK cells from donors of three age groups. P values were obtained by the Kruskal-Wallis test followed by Dunn’s multiple comparisons test. *P < 0.05, **P < 0.01, ***P < 0.001, ****P < 0.0001.

Age in decades

Age in decades

Age in decades

Age in decades

Age in decades

Age in decades

Age in decades

Age in decades

A

B

C

D

E

F

G

H

**

*

*

*

**

**Figure S3. Expression of co-inhibitory molecules on NK cells in three age groups**

Flow cytometry analysis of expression of 2B4 (A), CTLA-4 (B), TIM-3 (C), BTLA (D), CD70 (E), CD39 (F), CD160 (G) and TIGIT (H). Box plots of the positive percentage of the above receptors on NK cells from donors in three age groups (n = 27-37 for each group). P values were obtained by the Kruskal-Wallis test followed by Dunn’s multiple comparisons test. *P < 0.05, **P < 0.01.

Age in decades

Age in decades

Age in decades

B

C

D

E

****

***

****

***

Age in decades

r=0.1644

P=0.1058

A

Age in decades

F

Age in decades

F

≥60

M

F

M

M

F

20-39

40-59

**Figure S4. PD-1-positive NK cells accumulated in older people and accumulation of PD-1+ NK cells was independent of gender.**

(A) Box plots of the percentage of PD-1+ cells among CD56negCD16+ NK cells (A, left) from individuals in different age groups (n = 14-22 each group). Correlation analysis of the percentage of PD-1+ cells among CD56negCD16+ NK cells (A, right) with age on NK cells from all individuals. (B-E) Box plots of the percentage of PD-1+ cells among NK cells, CD56brightCD16- NK cells, CD56dimCD16+ NK cells, CD56negCD16+ NK cells from individuals in three age groups (n = 27-37 each group). (F) Box plots of PD-1 expression on NK cells from males and females (left). Box plots of PD-1 expression on NK cells from males and females in different age groups (right). P values were obtained by the Kruskal-Wallis test followed by Dunn’s multiple comparisons test. Spearman’s non-parametric test was used to test for correlations. ***P < 0.001, ****P < 0.0001.
